# Supplementary material for: Inhibitory IL-10-producing CD4+ T cells are T-bet-dependent and facilitate cytomegalovirus persistence via coexpression of arginase-1
Source: eLife. 2023 Jul 13;12:e79165. doi: 10.7554/eLife.79165 (PMC10344424; doi:10.7554/eLife.79165)
Supplement: Figure 1—source data 1. — Source data Figure 1C: gene ontology analysis indicating the top six modules that were upregulated (red) or downregulated (blue) in Thy1.1+ CD4+ T cells isolated from the salivary glands (SGs) on day 14 p.i. (10BiT mice). Source data Figure 1F: percent expression of IL-7R and TCF1/7 among Thy1.1+ CD4+ T cells and Thy1.1− CD4+ T cells isolated from the SGs on day 14 p.i. (10BiT mice). [file elife-79165-fig1-data1.xlsx]

## Sheet: Sheet1
Figure 1 source data file
1C	Thy1.1-	p value
	regulation of response to stimulus	4.31426
	intracellular signal transduction	4.03012
	T-cell activation	3.76955
	IFNγ production	3.58503
	leukocyte differentiation	3.25964
	immune response	3.05061
	Thy1.1+
	cell migration	74.471
	cell surface receptor signalling pathway	52.9788
	negative regulation of cellular proces	30.3585
	regulation of cellular proces	20.7213
	metabolic process	13.7122
	oxidation-reduction process	6.87615
1F		IL7r			TCF7
		Thy1.1-	Thy1.1+		Thy1.1-	Thy1.1+
		48.2	12.4		30	6.36
		50.8	16.7		9.45	2.31
		50.2	19		18.6	3.42
		50.7	18.5		29.6	6.37
		43.7	16.2		34.4	6.7
		45.6	12.9		29.4	6.55
		51.9	16.2		23.3	3.66
		48.6	13.6		26.2	3.09
		49.6	17.1		16.8	2.76
		42	14.4		29.6	7.76
