# Supplementary material for: Inhibitory IL-10-producing CD4+ T cells are T-bet-dependent and facilitate cytomegalovirus persistence via coexpression of arginase-1
Source: eLife. 2023 Jul 13;12:e79165. doi: 10.7554/eLife.79165 (PMC10344424; doi:10.7554/eLife.79165)
Supplement: Figure 4—source data 1. — Source data Figure 4A: murine cytomegalovirus (MCMV)-specific CD4+ T cell responses in the salivary glands (SGs) on days 7 and 14 p.i. measured using flow cytometry to detect interferon (IFN)γ (Cd4+/+Arg1flox/flox and Cd4Cre/+Arg1flox/flox mice). Source data Figure 4B: percent expression of Ki-67 among CD4+ T cells isolated from the SGs on day 14 p.i. measured via flow cytometry (Cd4+/+Arg1flox/flox and Cd4Cre/+Arg1flox/flox mice). Source data Figure 4C: MCMV tetramer+ CD8+ T cells quantified in spleens on day 30 p.i. via flow cytometry (Cd4+/+Arg1flox/flox and Cd4Cre/+Arg1flox/flox mice). Source data Figure 4D: MCMV-specific CD4+ T cell responses in the SGs on days 7 and 14 p.i. measured using flow cytometry to detect interleukin (IL)-10 (Cd4+/+Arg1flox/flox and Cd4Cre/+Arg1flox/flox mice). Source data Figure 4E: viral genomes in saliva (DNA copies/μl) on days 7, 14, 21, and 28 p.i. measured via qPCR (Cd4+/+Arg1flox/flox and Cd4Cre/+Arg1flox/flox mice). Source data Figure 4F: MCMV replication in SG homogenates (pfu/organ) on day 30 p.i. measured via plaque assay (Cd4+/+Arg1flox/flox and Cd4Cre/+Arg1flox/flox mice). [file elife-79165-fig4-data1.xlsx]

## Sheet: Sheet1
Figure 4 source data file
4A		Cd4cre-Arg1flox+/+	Cd4cre+Arg1flox+/+	Cd4cre-Arg1flox+/+	Cd4cre+Arg1flox+/+
		0.00015792	5.076e-05	0.0004536	0.00408184
		0	0	0.00421268	0.0048488
		0.00036483	0	0	0.00301184
		0.00015943	0	0.0009828	0.00899232
		0	0.00047678		0.00382272
4B		Cd4cre-Arg1flox+/+	Cd4cre+Arg1flox+/+
		2.99	6.57
		2.97	5.31
		3.37	10.9
		3.45	9.74
			7.69
4C		Cd4cre-Arg1flox+/+				Cd4cre+Arg1flox+/+
	IE3	0.00599808	0.0151384	0.0129613	0.0146861	0.031864	0.0167896	0.0353992	0.0261464
	m139	0.00784944	0.0189727	0.0138414	0.015284	0.0361339	0.0473661	0.0345882	0.032515
	M38	0.0116757	0.0299686	0.0213186	0.0248505	0.0793901	0.0807972	0.0661425	0.0489771
	M45	0.00371498	0.00897062	0.00448812	0.00549327	0.0120438	0.0111654	0.0144013	0.00975941
4D		Cd4cre-Arg1flox+/+	Cd4cre+Arg1flox+/+
		2.3912e-05	0.00020856
		0.00020111	0
		0	0.000560224
		0	0
		0.0006808	0.000545072
		0.000296856	0
		0.00040341	0
		0	1.4868e-05
		0.00024206
		0.00015728
4E	Hours	Cd4cre-Arg1flox+/+								Cd4cre+Arg1flox+/+
	7	4.18041	10.4092	11.8939	10.0974	1.2214	9.39113	1.87399	23.0041	9.19549	1.69071	3.59917	8.39373	4.88972	1.82639	4.78785
	14	537.296	4359.52	6595.56	400.139	1078.82	867.905	3842.2	123.084	103.52	141.299	115.55	56.6141	4.50534	476.874	132.032
	21	4111.89	1003.36	12667.4	1651.36	1264.83	625.528	433.263	1651.36	693.34	171.176	181.06	432.251	711.412	699.858	312.267
	28	3531.9	3632.44	880.172	1507.38	1564.87	2350.95	2047.88	202.102	168.002	91.6639	202.102	480.232	388.154	15.6381
4F		Cd4cre-Arg1flox+/+	Cd4cre+Arg1flox+/+
		15000	1
		12500	10000
		105000	37500
		55000	35000
		57500	5000
		102500	500
		75000
		102500
