# Supplementary material for: Inhibitory IL-10-producing CD4+ T cells are T-bet-dependent and facilitate cytomegalovirus persistence via coexpression of arginase-1
Source: eLife. 2023 Jul 13;12:e79165. doi: 10.7554/eLife.79165 (PMC10344424; doi:10.7554/eLife.79165)
Supplement: Figure 5—source data 1. — Source data Figure 5A: expression of T-bet (median fluorescence intensity, MFI) among Thy1.1+ CD4+ T cells and Thy1.1− CD4+ T cells isolated from the salivary glands (SGs) on day 14 p.i. measured via flow cytometry (10BiT mice). Source data Figure 5D: percent expression of CD4 versus T-bet among leukocytes isolated from the SGs on day 14 p.i. (Cd4+/+Tbx21flox/flox and Cd4CreERT2/+Tbx21flox/flox mice). [file elife-79165-fig5-data1.xlsx]

## Sheet: Sheet1
Figure 5 source data file
5A	Thy1.1-	Thy1.1+
	307	516
	760	1237
	451	780
	453	896
	518	885
	434	773
	124	336
	188	530
	179	599
	217	446
	119	366
5D	CD4cre+ (-Tam)	CD4cre+ (+Tam)	CD4cre- (+Tam)
	4.35	0.82	8.33
	4.27	0.098	6.25
	0	0.23	0.85
	5.11	0.18	4.17
	3.57	0.12	0
