# Supplementary material for: Inhibitory IL-10-producing CD4+ T cells are T-bet-dependent and facilitate cytomegalovirus persistence via coexpression of arginase-1
Source: eLife. 2023 Jul 13;12:e79165. doi: 10.7554/eLife.79165 (PMC10344424; doi:10.7554/eLife.79165)
Supplement: Figure 6—source data 1. — Source data Figure 6A: murine cytomegalovirus (MCMV)-specific CD4+ T cell responses in the salivary glands (SGs) on day 14 p.i. measured using flow cytometry to detect IL-10 (Cd4+/+Tbx21flox/flox and Cd4CreERT2/+Tbx21flox/flox mice). Source data Figure 6B: percent expression of arginase-1 (Arg1) among CD4+ T cells isolated from the SGs on day 14 p.i measured via flow cytometry (Cd4+/+Tbx21flox/flox and Cd4CreERT2/+Tbx21flox/flox mice). Source data Figure 4D–G: percent expression of CD44 (D), PD-1 (E), CD62L (F), and IL-7R (G) among CD4+ T cells isolated from SGs on day 14 p.i. measured via flow cytometry (Cd4+/+Tbx21flox/flox and Cd4CreERT2/+Tbx21flox/flox mice). Source data Figure 6H: MCMV-specific CD4+ T cell responses in the SGs on day 14 p.i. measured using flow cytometry to detect interferon (IFN)γ (Cd4+/+Tbx21flox/flox and Cd4CreERT2/+Tbx21flox/flox mice). Source data Figure 6I: MCMV replication in SG homogenates (pfu/organ) on day 14 p.i. measured via plaque assay (Cd4+/+Tbx21flox/flox and Cd4CreERT2/+Tbx21flox/flox mice). Source data Figure 6J: viral genomes in saliva (DNA copies/μl) on days 14, 21, and 28 p.i. measured via qPCR (Cd4+/+Tbx21flox/flox and Cd4CreERT2/+Tbx21flox/flox mice). [file elife-79165-fig6-data1.xlsx]

## Sheet: Sheet1
Figure 6 source data file
6A	CD4cre-	CD4cre+ RFP+
	0.00095536	0.00069597
	0.004698	0
	0.00439639	0.00061765
	0.00084472	0
	0	0
	0	0
	0.00058752	0
	0	0
	0.00075847	0
	0.00136857	0
	0	0
	0.00112404	0
	0.0011844	0
6B	CD4cre-	CD4cre+ RFP+
	12.3	8.18
	11.6	7.75
	14.9	7.42
	13.1	7.26
	10.4	7.79
6D	CD4cre-	CD4cre+ RFP+
	61.5	31.2
	69.8	11.6
	63.9	19.5
	93.1	24.2
	60.2	16.4
6E	CD4cre-	CD4cre+ RFP+
	65.5	41.5
	66.5	17.8
	69.6	16.6
	87.6	19
	54	18.4
6F	CD4cre-	CD4cre+ RFP+
	1.19	40.3
	0.99	43.2
	2.72	41.5
	1.11	40.3
	1.9	41.1
6G	CD4cre-	CD4cre+ RFP+
	8.67	19.9
	4.07	17
	7.8	13.6
	8.97
6H	CD4cre- (+Tam)	CD4cre+ (-Tam)	CD4cre+ (+Tam)
	0.00074285	0.00044334	0.00271428
	0.00135	0.00021073	0.00108927
	0	0	0.0012353
	0.00058481	0.00122236	0.00296415
	0.00038955		0.00092062
6I	CD4cre-	CD4cre+ RFP+
	60000	32000
	60000	650
	89000	41500
	61000	30500
		20000
		46000
	166000	1
	62000	31000
		47500
	290000	155000
	55000	355000
	225000	195000
	375000	60000
		3000
6J	Days p.i	CD4cre-					CD4cre+ RFP+
	14	193.769	263.249	270.743	401.076	1073.79	2.29694	87.8845	75.1359	22.3673	64.2366
	21	4064.07	2312.76	1913.57	8692.15	42.758	566.995	343.699	455
	28	2400.96	5705.14	849.824	25.2604	175.637	1106.94	145.321	124.823
