# Supplementary figures and images for: Inhibitory IL-10-producing CD4+ T cells are T-bet-dependent and facilitate cytomegalovirus persistence via coexpression of arginase-1
Source: eLife journal article supplement (doi:10.7554/elife.79165), 2023-05-12

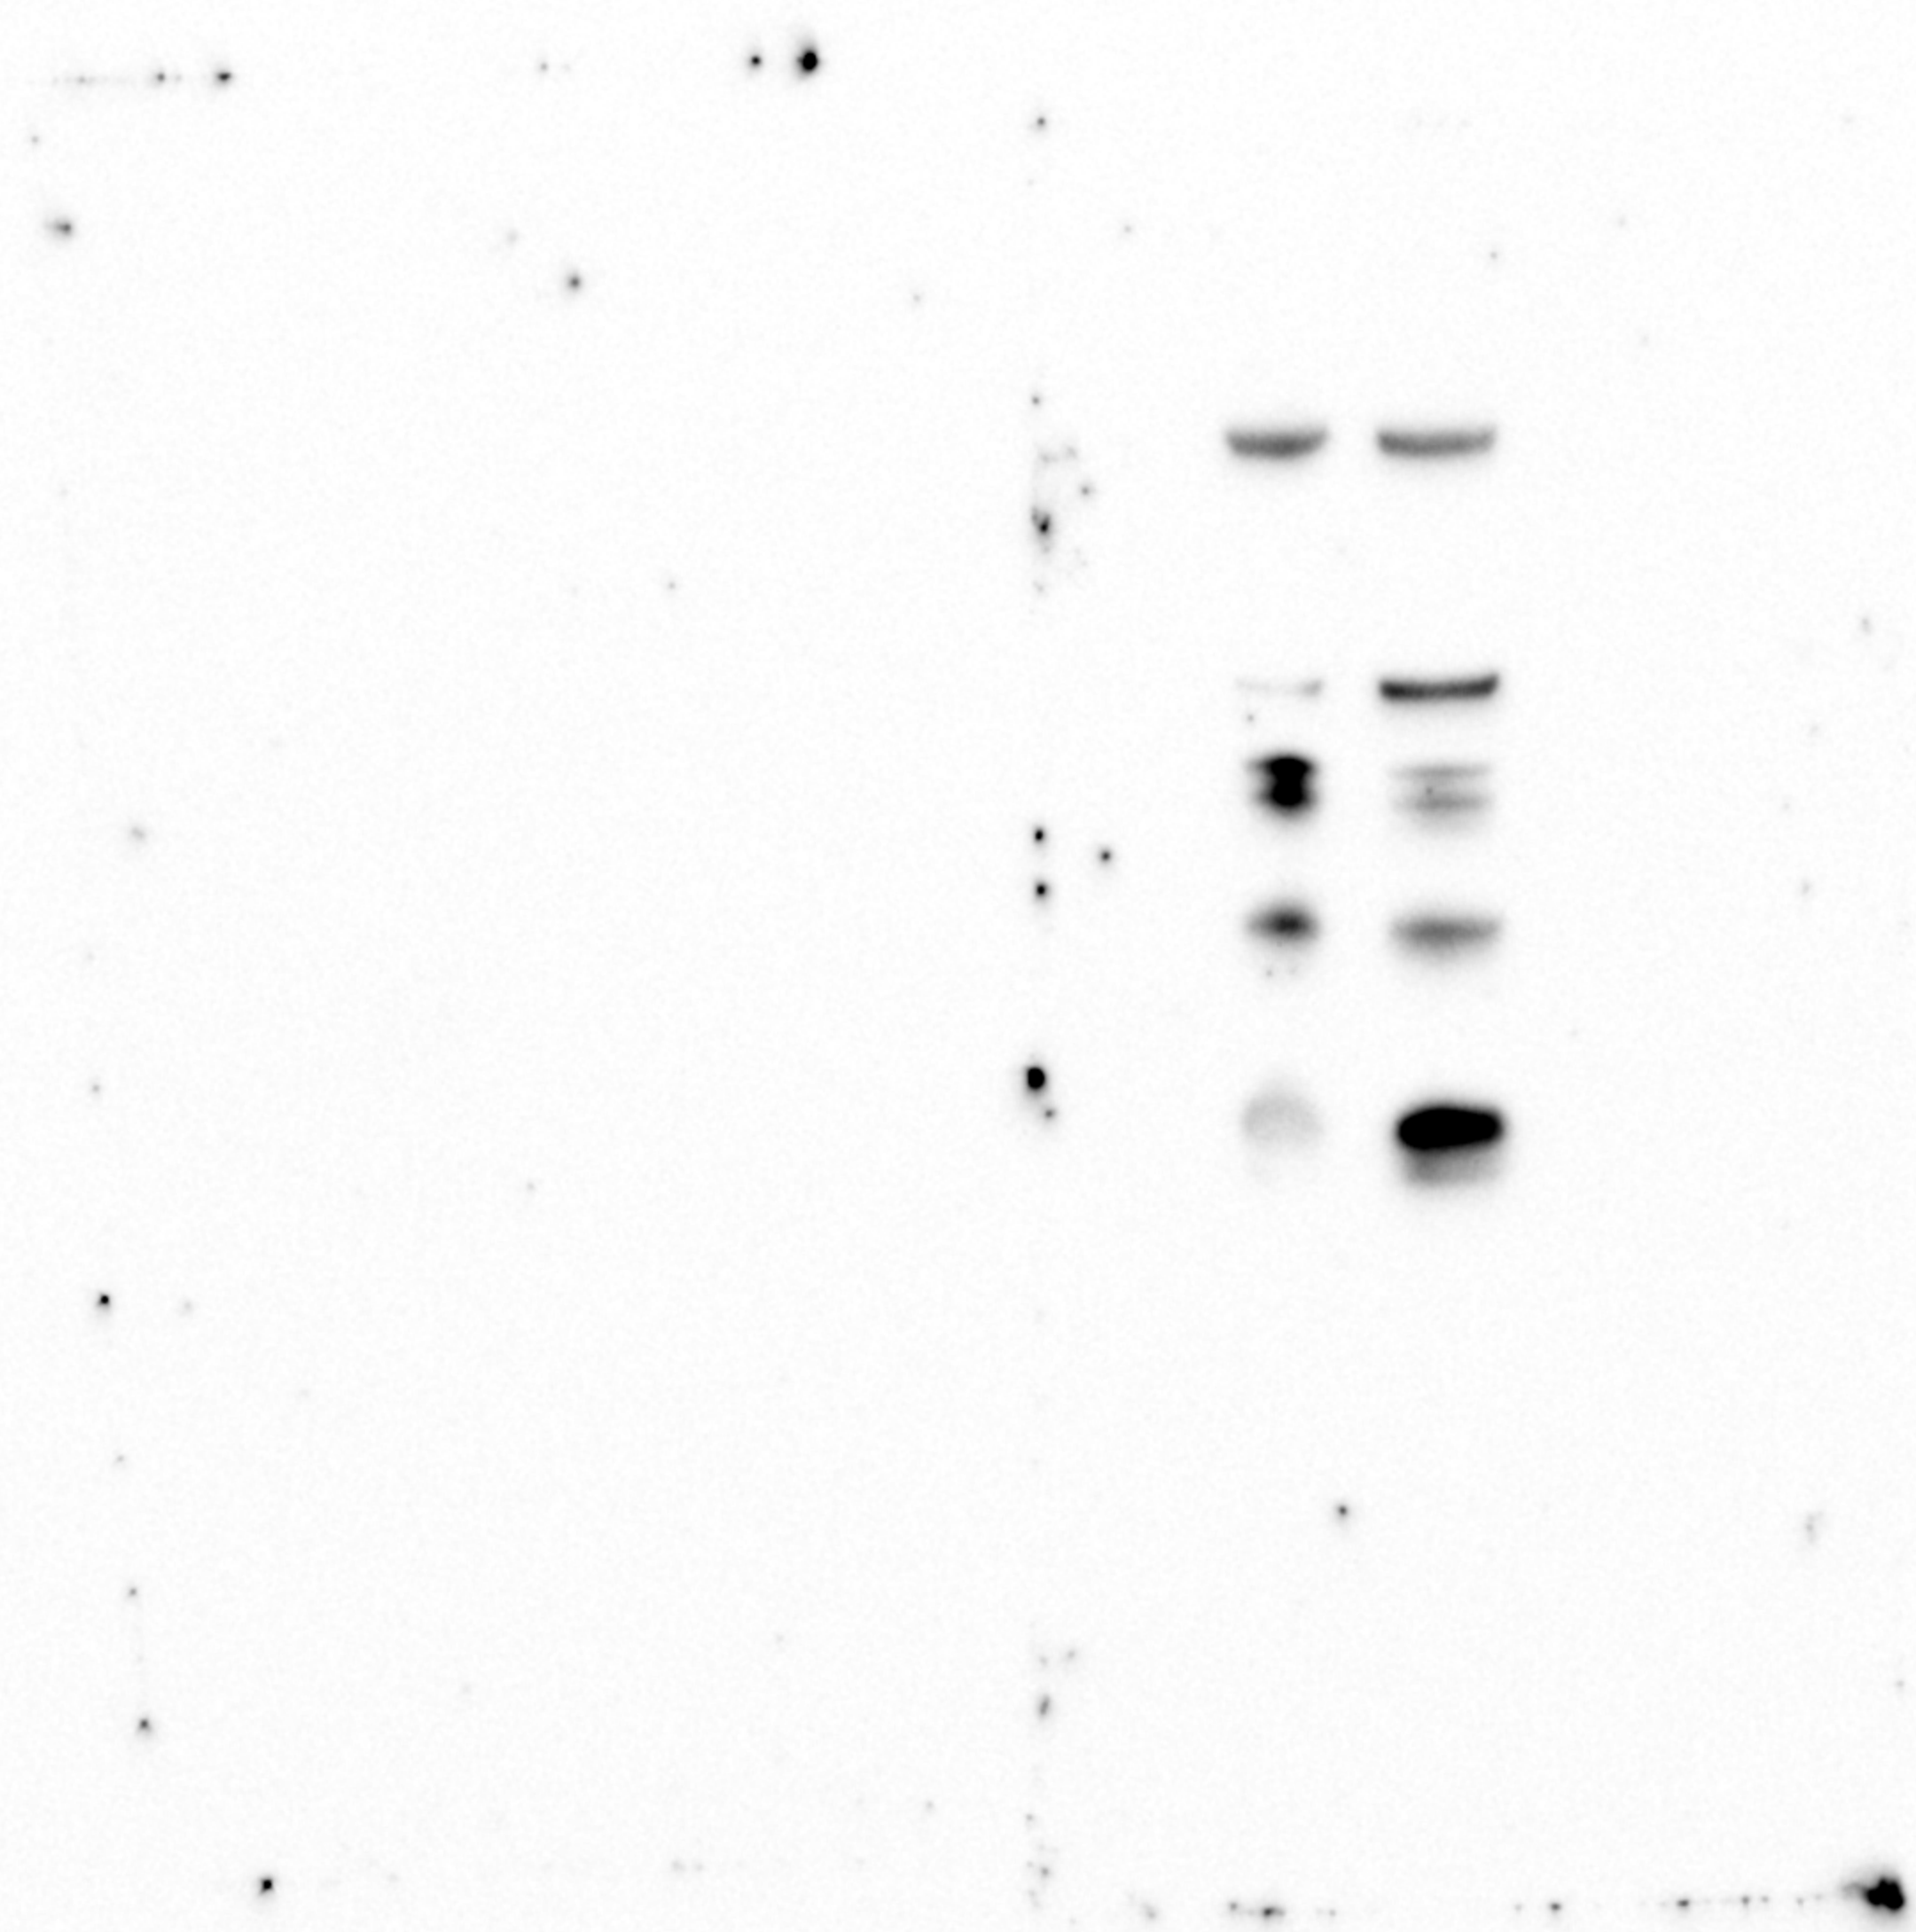

Supplement: fig3-data1 [file elife-79165-fig3-data1-v1.zip]

Clement\_et\_al  
Figure 3C uncut gels  
Black boxes indicate lanes run

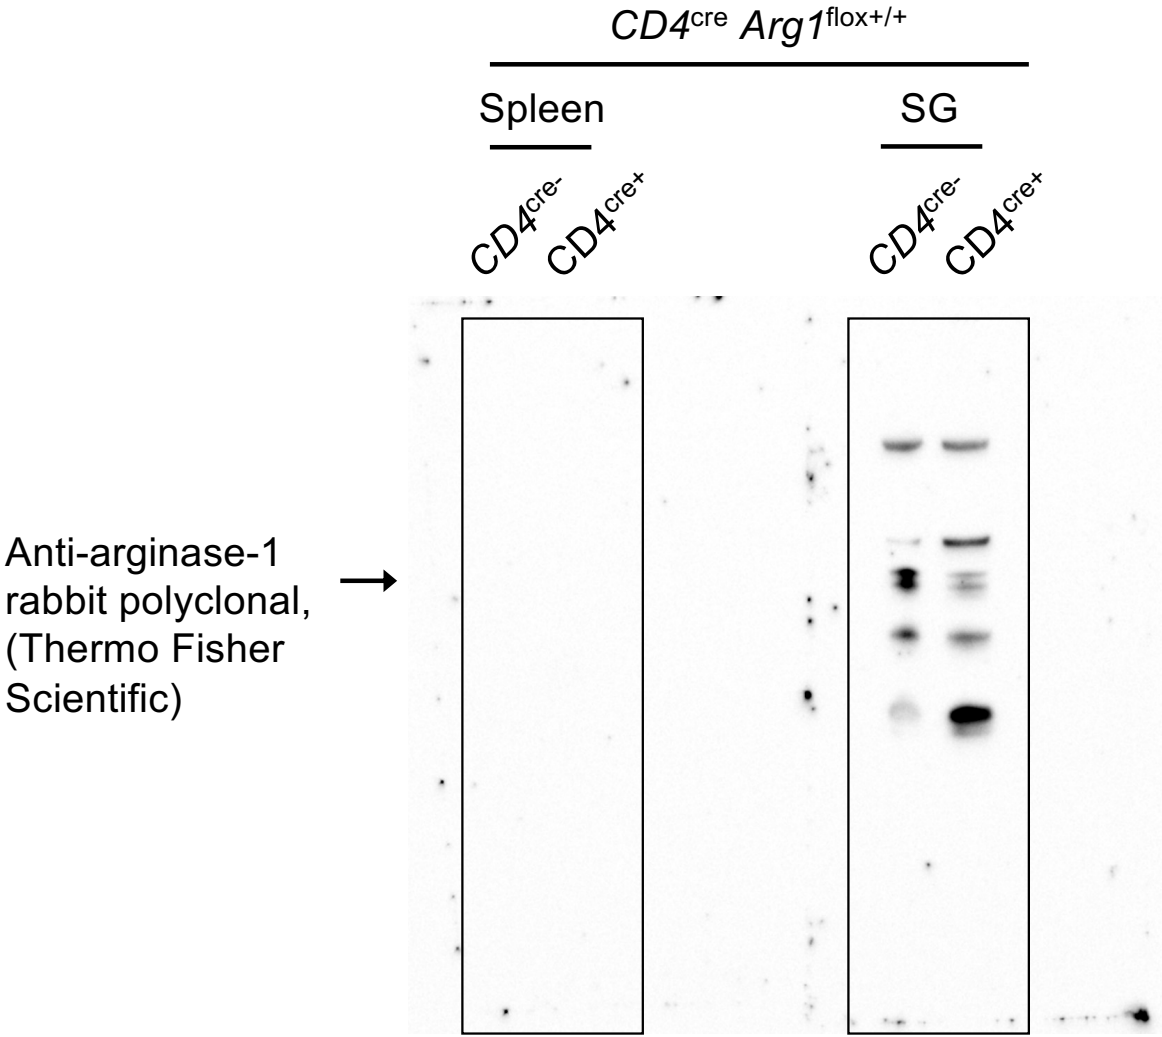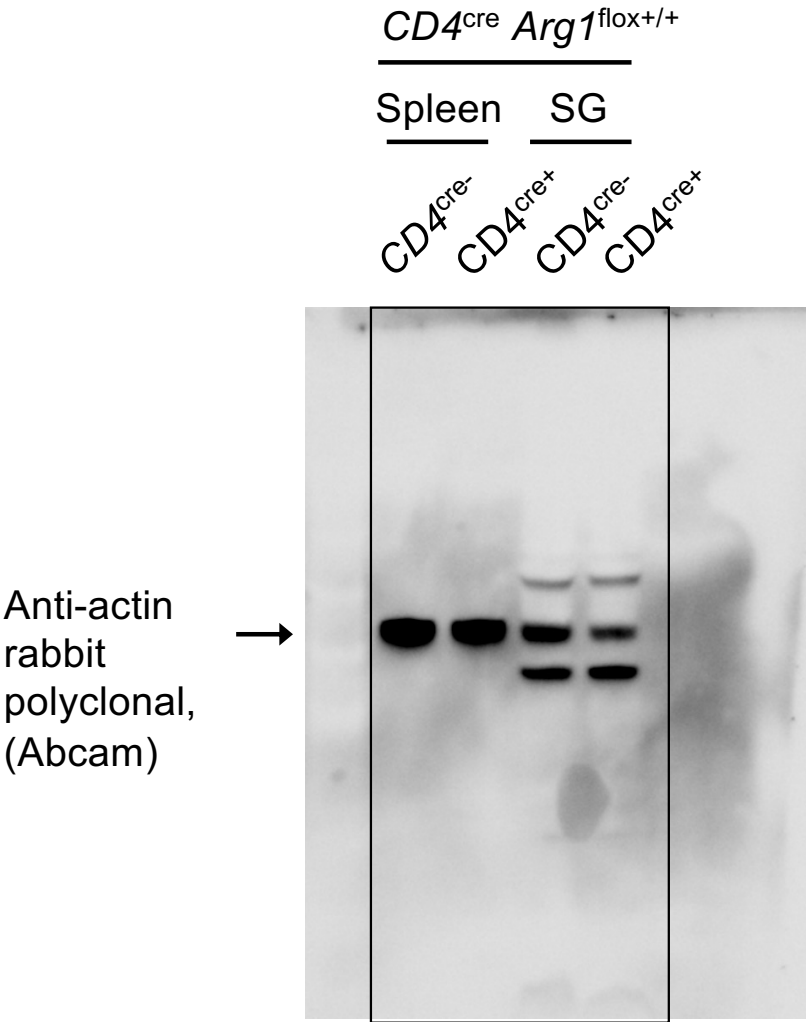

Supplement: fig3-data1 [file elife-79165-fig3-data1-v1.zip]

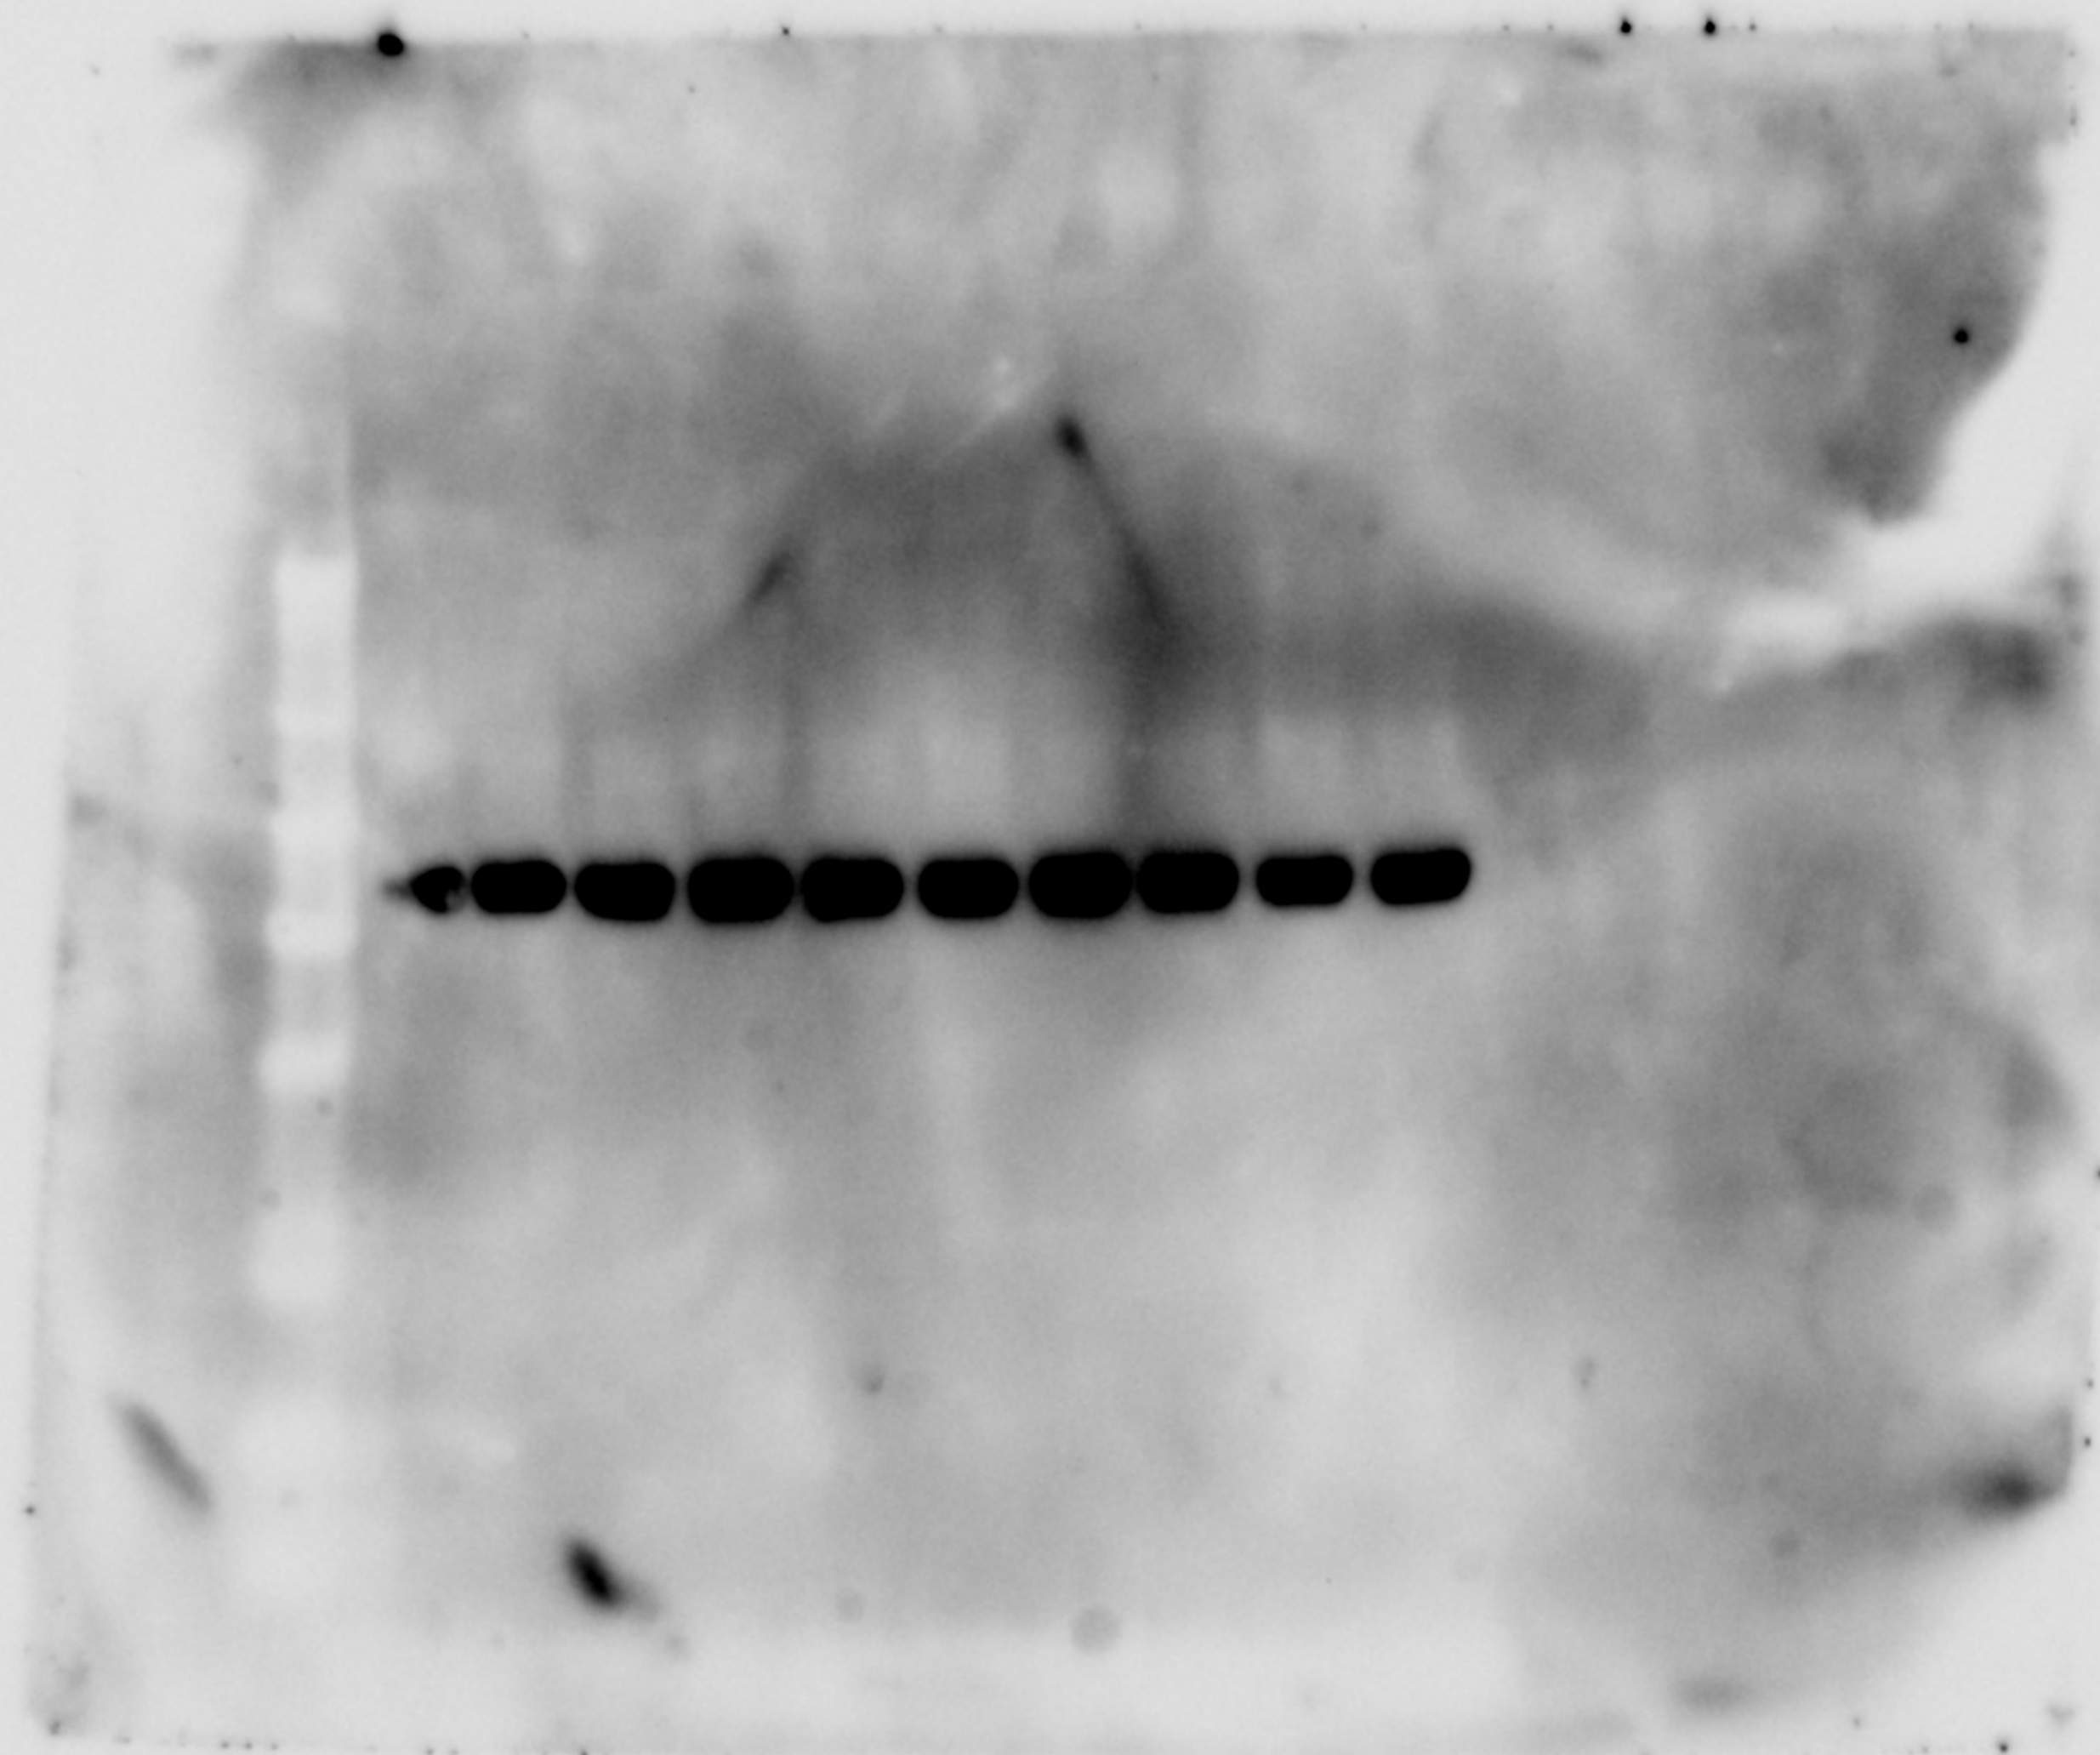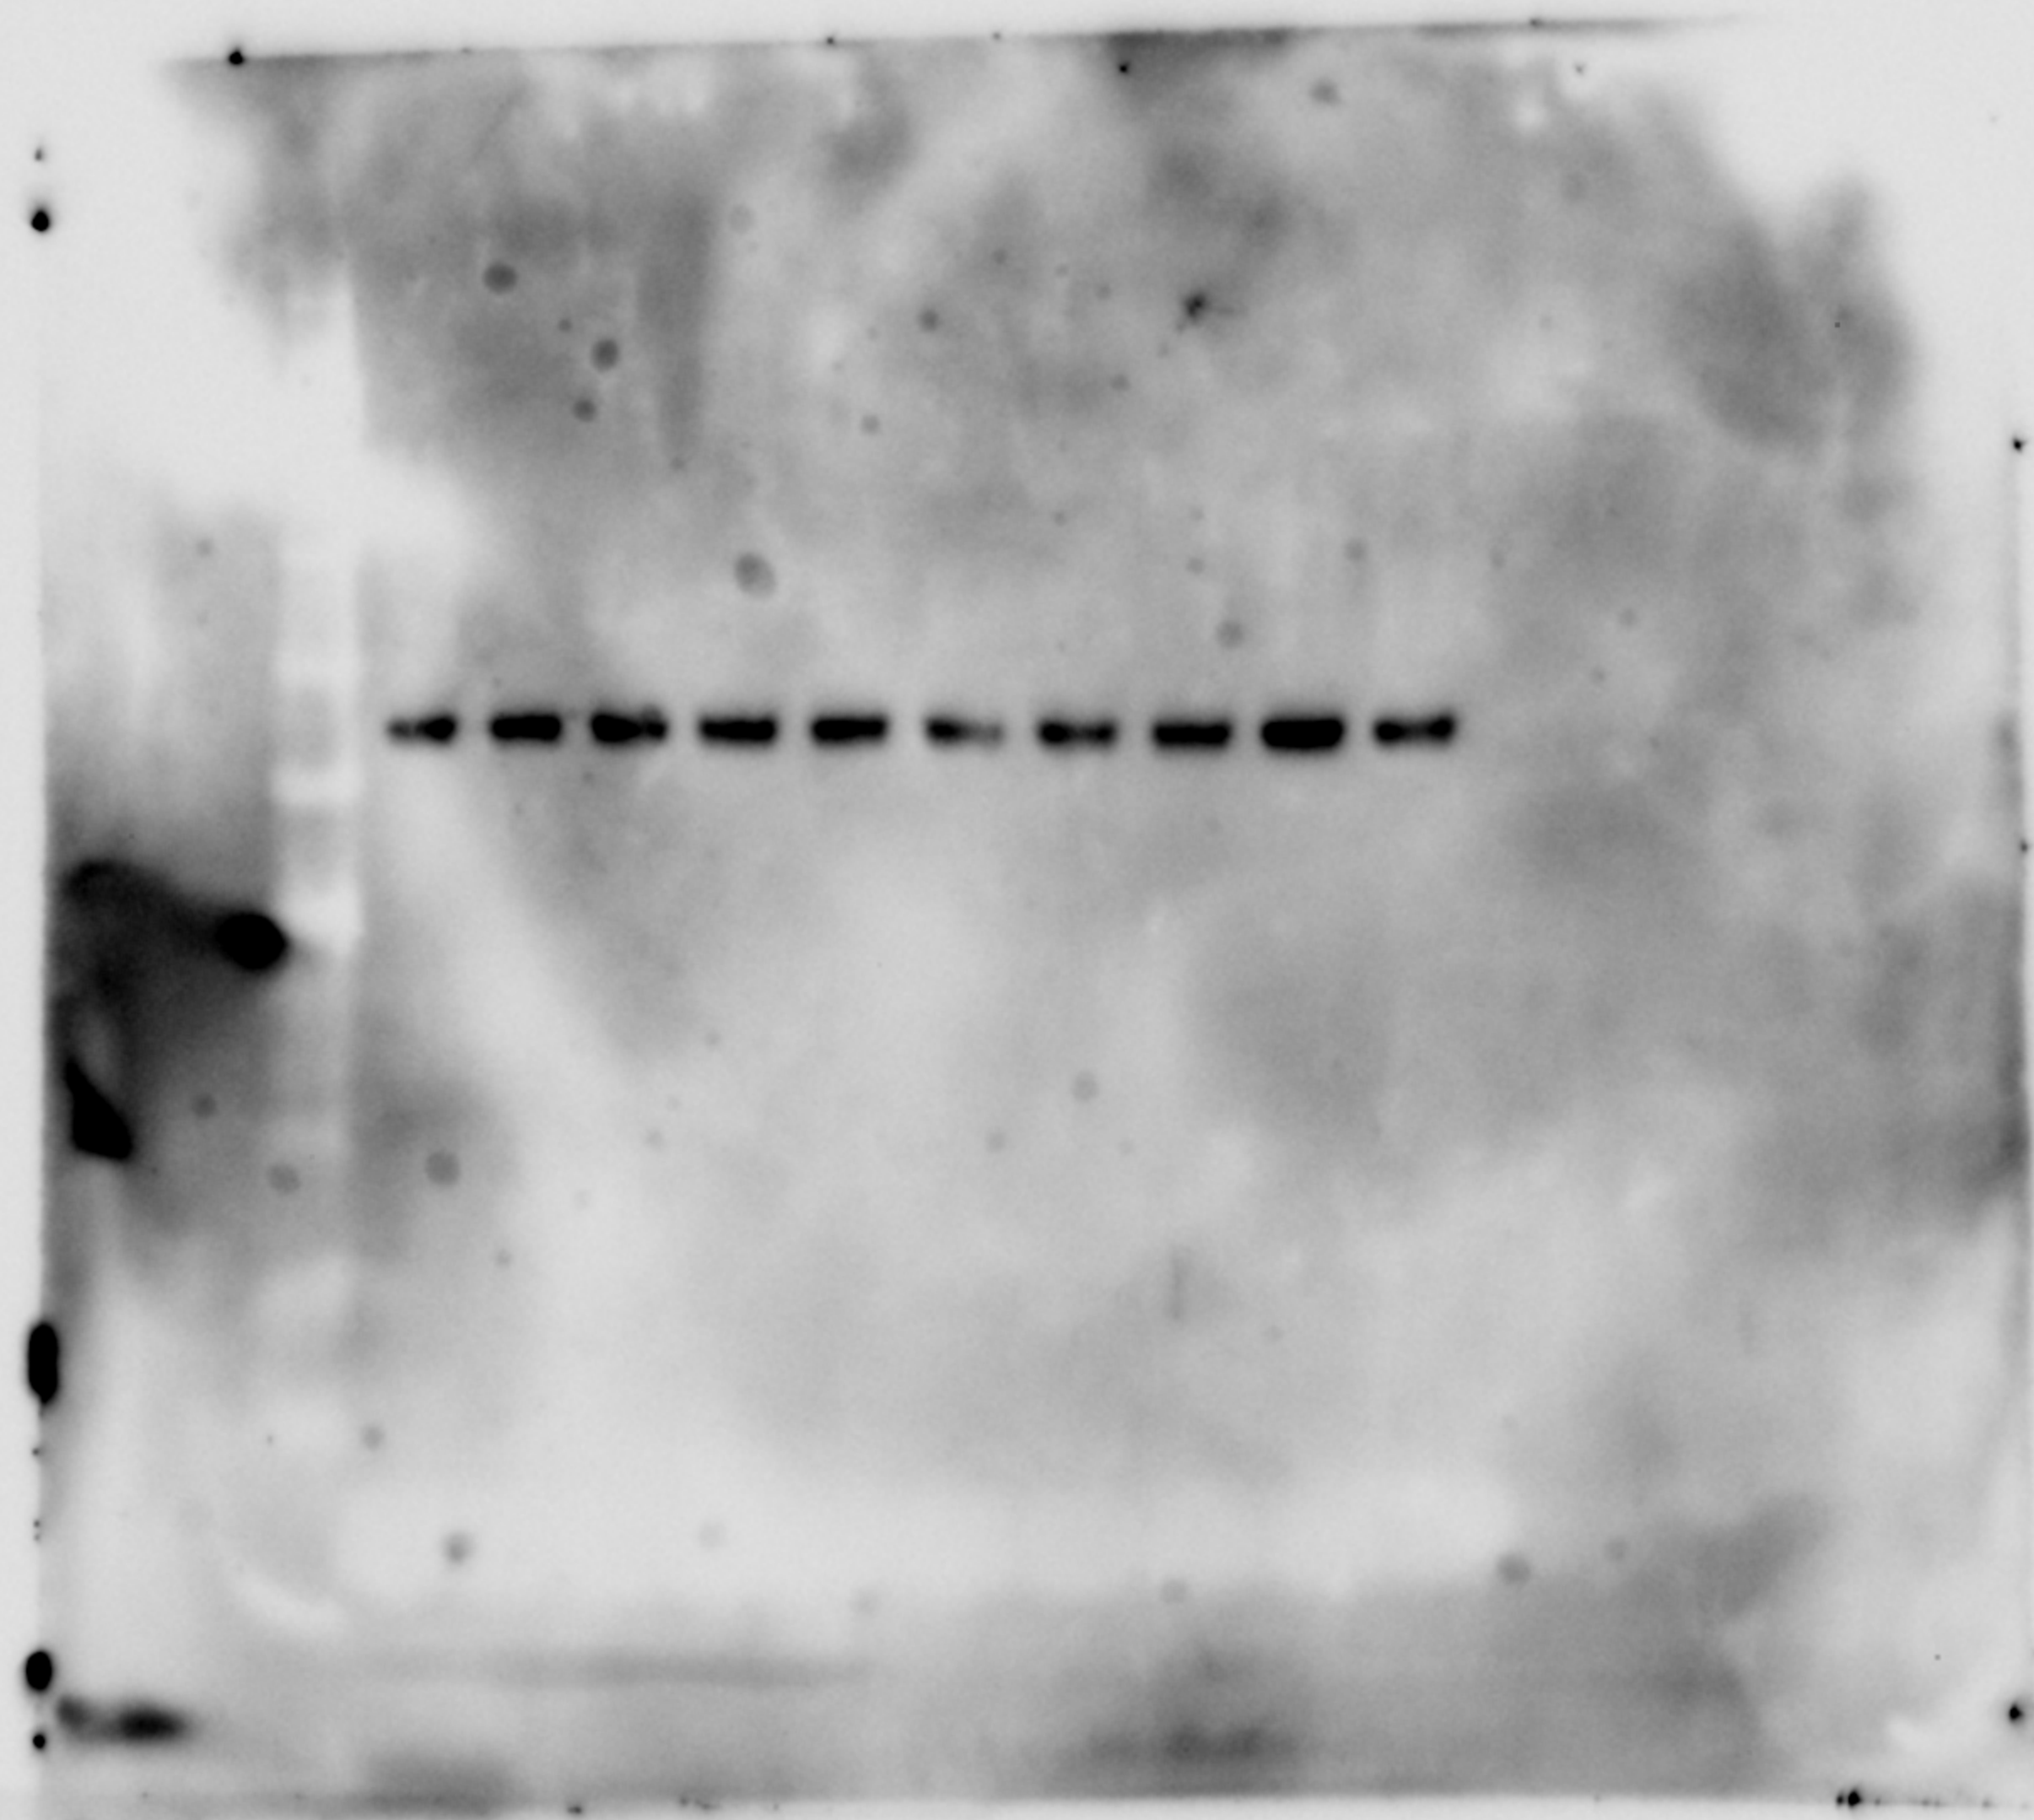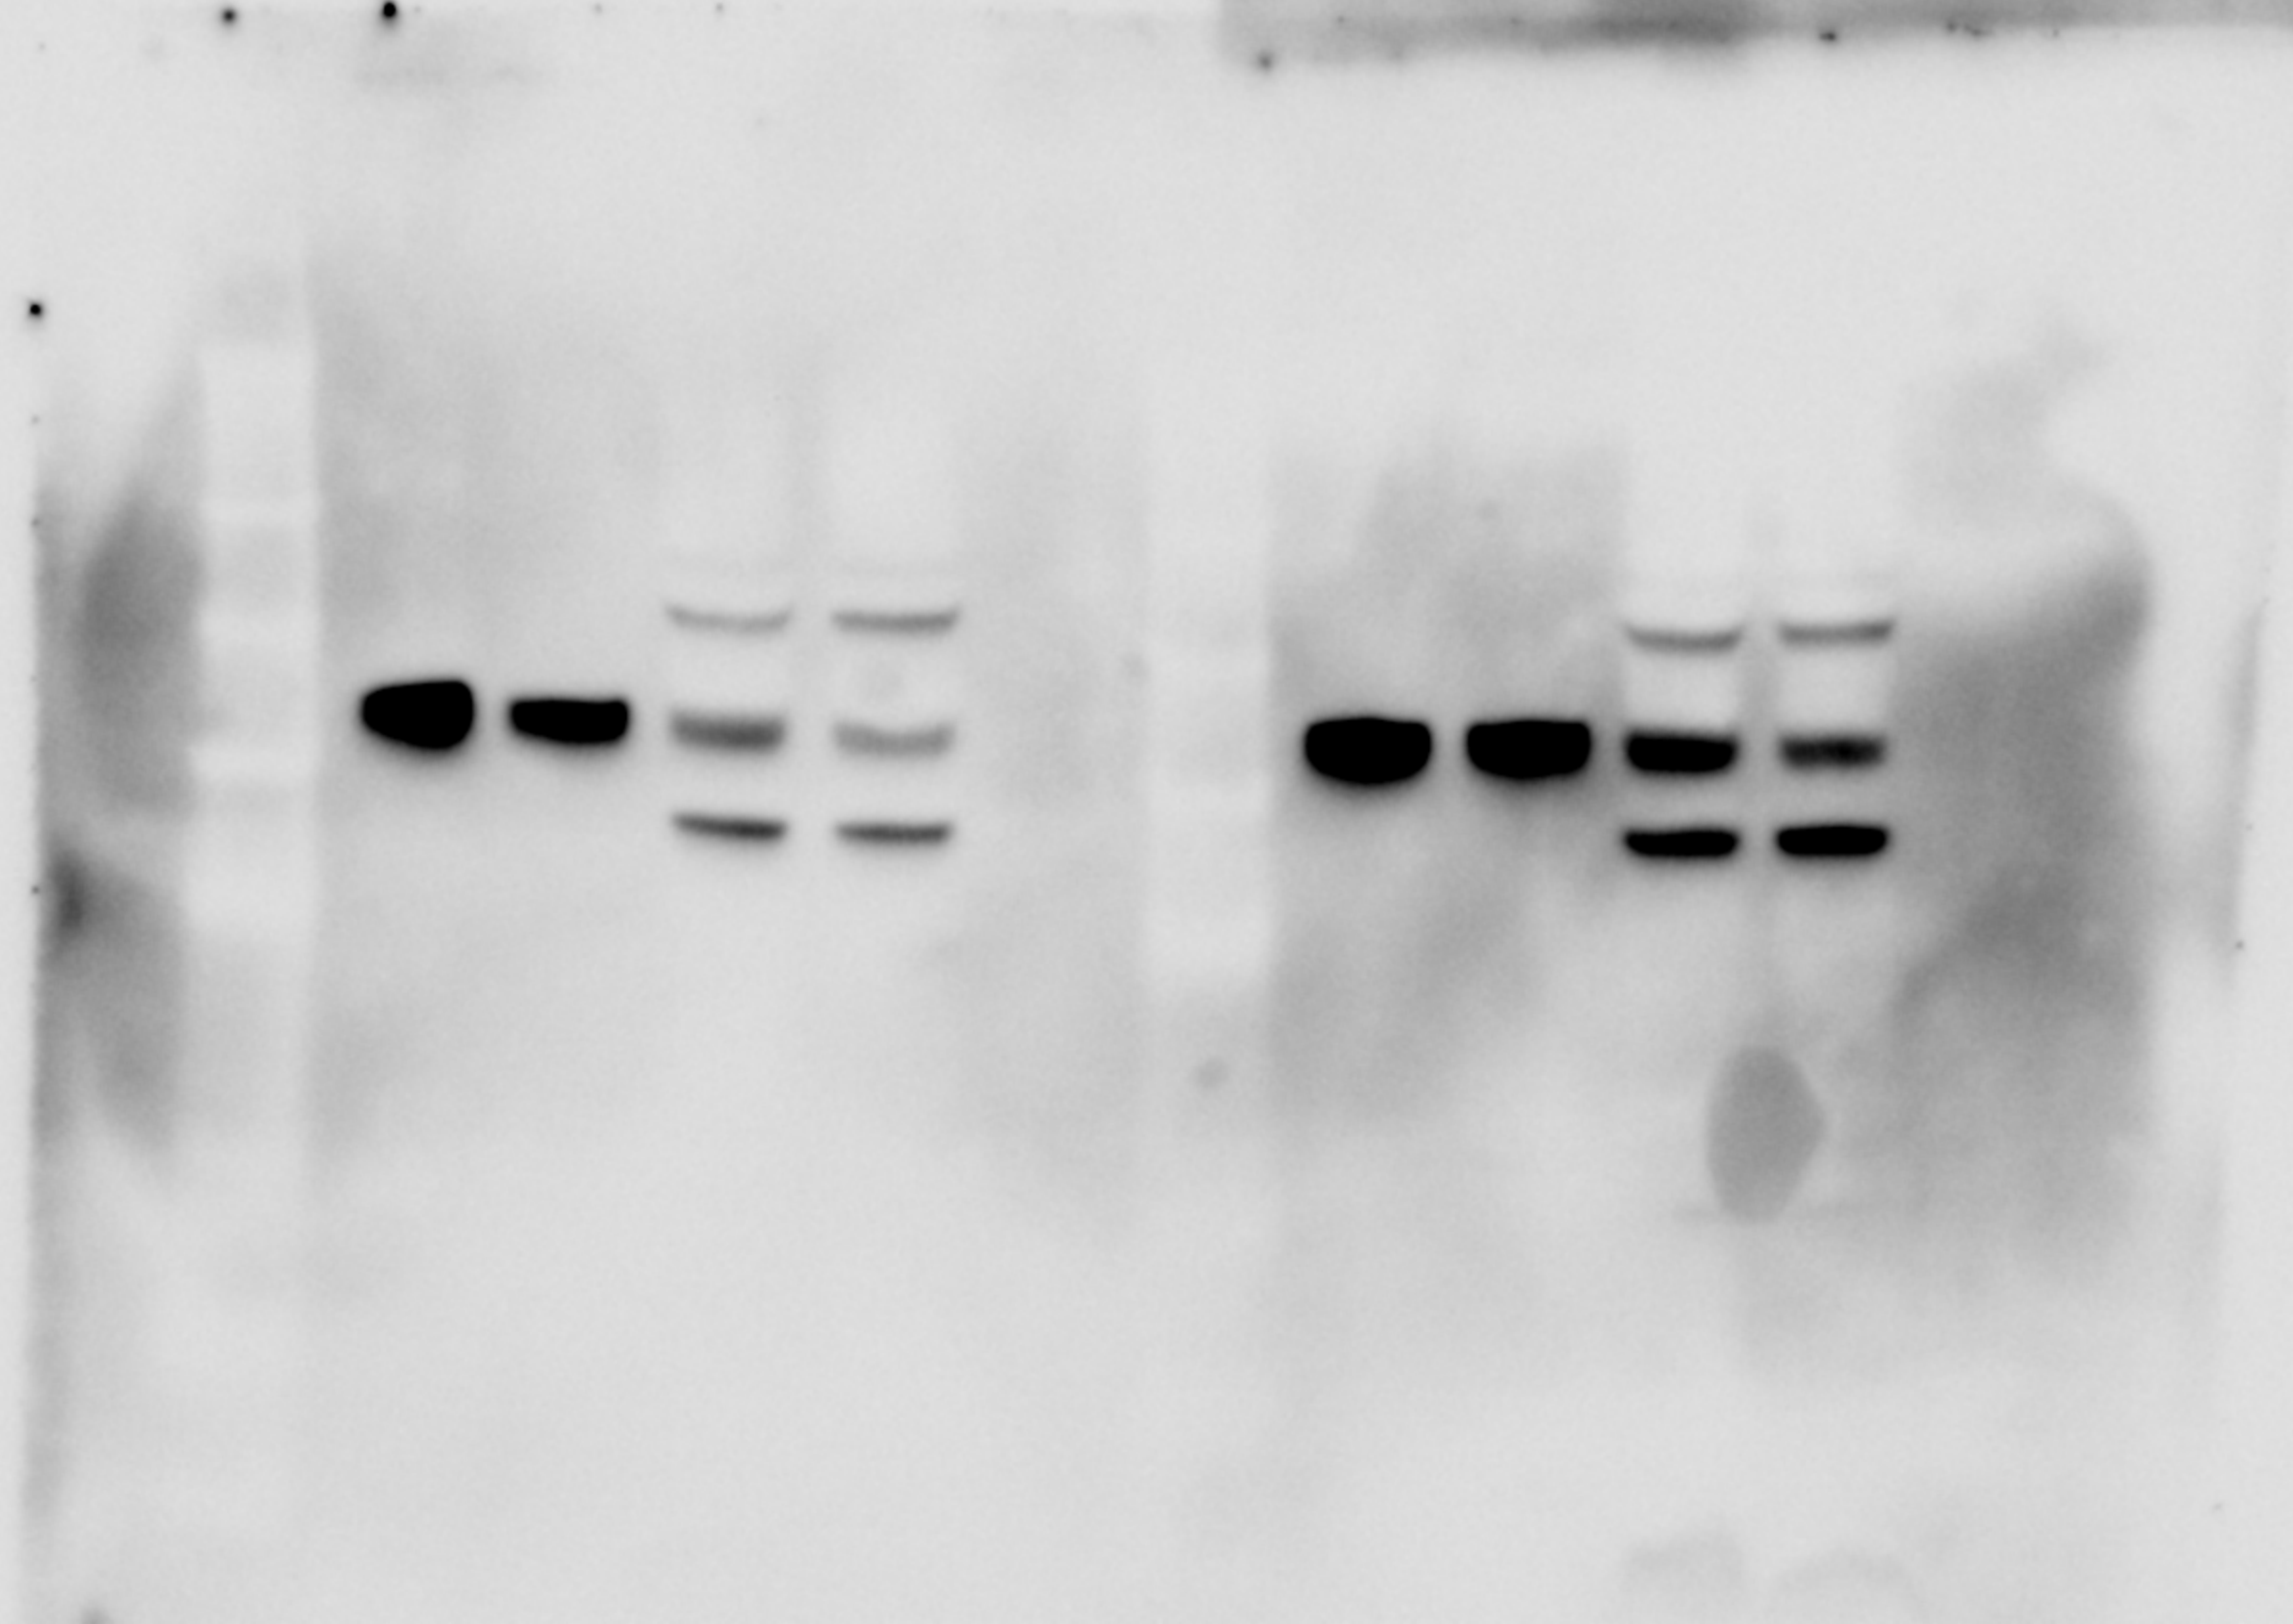

Supplement: fig3-data1 [file elife-79165-fig3-data1-v1.zip]
